# Supplementary material
Source: Research Square preprint supplement (doi:10.21203/rs.3.rs-8937973/v1)
Supplement: Supplementary file 1 [file d284603e8856267f77e24319.docx]

**Supplementary Table 1: Individual Patient-Level Data (N=312)**

| Patient ID | Age (yrs) | PSA (ng/mL) | PSA Group | PI-RADS Score | PI-RADS Group | SUVmax | SUVmax Group | Biopsy/Surgery Pathology | Gleason Score | ISUP Grade | csPca (Y/N) |
| --- | --- | --- | --- | --- | --- | --- | --- | --- | --- | --- | --- |
| BJSH001 | 68 | 8.2 | <10 | 3 | 3 | 3.2 | <4 | BPH | N/A | N/A | N |
| BJSH002 | 72 | 12.5 | 10-20 | 4 | 4 | 5.8 | 4-8 | Prostate Cancer | 3+4=7 | 2 | Y |
| BJSH003 | 65 | 24.3 | >20 | 5 | 5 | 12.4 | >8 | Prostate Cancer | 4+5=9 | 5 | Y |
| BJSH004 | 71 | 6.8 | <10 | 3 | 3 | 2.8 | <4 | BPH | N/A | N/A | N |
| BJSH005 | 74 | 18.6 | 10-20 | 4 | 4 | 7.2 | 4-8 | Prostate Cancer | 4+3=7 | 3 | Y |
| BJSH006 | 69 | 32.1 | >20 | 5 | 5 | 15.6 | >8 | Prostate Cancer | 4+4=8 | 4 | Y |
| BJSH007 | 66 | 9.4 | <10 | 4 | 4 | 4.5 | 4-8 | Prostate Cancer | 3+3=6 | 1 | N |
| BJSH008 | 73 | 14.2 | 10-20 | 3 | 3 | 3.8 | <4 | Chronic Prostatitis | N/A | N/A | N |
| BJSH009 | 70 | 22.8 | >20 | 5 | 5 | 10.2 | >8 | Prostate Cancer | 4+5=9 | 5 | Y |
| BJSH010 | 67 | 11.3 | 10-20 | 4 | 4 | 6.5 | 4-8 | Prostate Cancer | 3+4=7 | 2 | Y |
| BJSH011 | 75 | 16.7 | 10-20 | 4 | 4 | 8.2 | >8 | Prostate Cancer | 4+3=7 | 3 | Y |
| BJSH012 | 64 | 7.5 | <10 | 3 | 3 | 3.1 | <4 | BPH | N/A | N/A | N |
| BJSH013 | 72 | 28.4 | >20 | 5 | 5 | 14.8 | >8 | Prostate Cancer | 4+5=9 | 5 | Y |
| BJSH014 | 69 | 13.8 | 10-20 | 4 | 4 | 5.5 | 4-8 | Prostate Cancer | 3+4=7 | 2 | Y |
| BJSH015 | 71 | 9.6 | <10 | 3 | 3 | 2.9 | <4 | HGPIN | N/A | N/A | N |
| BJSH016 | 68 | 19.2 | 10-20 | 5 | 5 | 9.6 | >8 | Prostate Cancer | 4+3=7 | 3 | Y |
| BJSH017 | 74 | 31.5 | >20 | 5 | 5 | 18.3 | >8 | Prostate Cancer | 5+4=9 | 5 | Y |
| BJSH018 | 66 | 8.9 | <10 | 3 | 3 | 3.4 | <4 | BPH | N/A | N/A | N |
| BJSH019 | 70 | 15.4 | 10-20 | 4 | 4 | 7.8 | 4-8 | Prostate Cancer | 3+4=7 | 2 | Y |
| BJSH020 | 73 | 26.7 | >20 | 5 | 5 | 11.5 | >8 | Prostate Cancer | 4+4=8 | 4 | Y |
| BJSH021 | 67 | 10.8 | 10-20 | 4 | 4 | 4.9 | 4-8 | Prostate Cancer | 3+4=7 | 2 | Y |
| BJSH022 | 72 | 7.2 | <10 | 3 | 3 | 2.7 | <4 | BPH | N/A | N/A | N |
| BJSH023 | 69 | 21.5 | >20 | 5 | 5 | 13.2 | >8 | Prostate Cancer | 4+5=9 | 5 | Y |
| BJSH024 | 65 | 14.9 | 10-20 | 4 | 4 | 6.8 | 4-8 | Prostate Cancer | 3+4=7 | 2 | Y |
| BJSH025 | 74 | 12.1 | 10-20 | 3 | 3 | 3.5 | <4 | Chronic Prostatitis | N/A | N/A | N |
| BJSH026 | 68 | 29.8 | >20 | 5 | 5 | 16.2 | >8 | Prostate Cancer | 4+5=9 | 5 | Y |
| BJSH027 | 71 | 9.8 | <10 | 4 | 4 | 4.2 | 4-8 | Prostate Cancer | 3+3=6 | 1 | N |
| BJSH028 | 66 | 17.3 | 10-20 | 4 | 4 | 7.5 | 4-8 | Prostate Cancer | 4+3=7 | 3 | Y |
| BJSH029 | 73 | 23.6 | >20 | 5 | 5 | 11.8 | >8 | Prostate Cancer | 4+4=8 | 4 | Y |
| BJSH030 | 70 | 8.5 | <10 | 3 | 3 | 3.0 | <4 | BPH | N/A | N/A | N |
| BJSH031 | 67 | 15.8 | 10-20 | 4 | 4 | 6.2 | 4-8 | Prostate Cancer | 3+4=7 | 2 | Y |
| BJSH032 | 72 | 27.3 | >20 | 5 | 5 | 14.1 | >8 | Prostate Cancer | 4+5=9 | 5 | Y |
| BJSH033 | 69 | 11.6 | 10-20 | 3 | 3 | 3.7 | <4 | HGPIN | N/A | N/A | N |
| BJSH034 | 65 | 33.7 | >20 | 5 | 5 | 19.5 | >8 | Prostate Cancer | 5+4=9 | 5 | Y |
| BJSH035 | 74 | 13.4 | 10-20 | 4 | 4 | 5.9 | 4-8 | Prostate Cancer | 3+4=7 | 2 | Y |
| BJSH036 | 68 | 9.2 | <10 | 3 | 3 | 3.3 | <4 | BPH | N/A | N/A | N |
| BJSH037 | 71 | 20.8 | >20 | 5 | 5 | 10.8 | >8 | Prostate Cancer | 4+3=7 | 3 | Y |
| BJSH038 | 66 | 14.5 | 10-20 | 4 | 4 | 7.1 | 4-8 | Prostate Cancer | 3+4=7 | 2 | Y |
| BJSH039 | 73 | 7.8 | <10 | 3 | 3 | 2.6 | <4 | BPH | N/A | N/A | N |
| BJSH040 | 70 | 25.9 | >20 | 5 | 5 | 13.8 | >8 | Prostate Cancer | 4+4=8 | 4 | Y |
| BJSH041 | 67 | 12.8 | 10-20 | 4 | 4 | 5.2 | 4-8 | Prostate Cancer | 3+4=7 | 2 | Y |
| BJSH042 | 72 | 30.4 | >20 | 5 | 5 | 17.1 | >8 | Prostate Cancer | 4+5=9 | 5 | Y |
| BJSH043 | 69 | 9.5 | <10 | 4 | 4 | 4.6 | 4-8 | Prostate Cancer | 3+3=6 | 1 | N |
| BJSH044 | 65 | 18.9 | 10-20 | 5 | 5 | 9.2 | >8 | Prostate Cancer | 4+3=7 | 3 | Y |
| BJSH045 | 74 | 22.4 | >20 | 5 | 5 | 12.6 | >8 | Prostate Cancer | 4+5=9 | 5 | Y |
| BJSH046 | 68 | 8.8 | <10 | 3 | 3 | 3.2 | <4 | BPH | N/A | N/A | N |
| BJSH047 | 71 | 16.2 | 10-20 | 4 | 4 | 7.9 | 4-8 | Prostate Cancer | 3+4=7 | 2 | Y |
| BJSH048 | 66 | 34.5 | >20 | 5 | 5 | 20.1 | >8 | Prostate Cancer | 5+4=9 | 5 | Y |
| BJSH049 | 73 | 11.9 | 10-20 | 3 | 3 | 3.6 | <4 | Chronic Prostatitis | N/A | N/A | N |
| BJSH050 | 70 | 24.8 | >20 | 5 | 5 | 14.5 | >8 | Prostate Cancer | 4+4=8 | 4 | Y |
| BJSH051 | 67 | 10.5 | 10-20 | 4 | 4 | 5.1 | 4-8 | Prostate Cancer | 3+4=7 | 2 | Y |
| BJSH052 | 72 | 8.1 | <10 | 3 | 3 | 2.9 | <4 | BPH | N/A | N/A | N |
| BJSH053 | 69 | 19.8 | 10-20 | 4 | 4 | 8.4 | >8 | Prostate Cancer | 4+3=7 | 3 | Y |
| BJSH054 | 65 | 28.9 | >20 | 5 | 5 | 15.2 | >8 | Prostate Cancer | 4+5=9 | 5 | Y |
| BJSH055 | 74 | 13.7 | 10-20 | 4 | 4 | 6.4 | 4-8 | Prostate Cancer | 3+4=7 | 2 | Y |
| BJSH056 | 68 | 7.9 | <10 | 3 | 3 | 3.1 | <4 | HGPIN | N/A | N/A | N |
| BJSH057 | 71 | 21.2 | >20 | 5 | 5 | 11.2 | >8 | Prostate Cancer | 4+4=8 | 4 | Y |
| BJSH058 | 66 | 15.1 | 10-20 | 4 | 4 | 7.3 | 4-8 | Prostate Cancer | 3+4=7 | 2 | Y |
| BJSH059 | 73 | 32.8 | >20 | 5 | 5 | 18.9 | >8 | Prostate Cancer | 5+4=9 | 5 | Y |
| BJSH060 | 70 | 9.7 | <10 | 4 | 4 | 4.8 | 4-8 | Prostate Cancer | 3+3=6 | 1 | N |
| BJSH061 | 67 | 17.9 | 10-20 | 4 | 4 | 8.1 | >8 | Prostate Cancer | 4+3=7 | 3 | Y |
| BJSH062 | 72 | 26.5 | >20 | 5 | 5 | 13.5 | >8 | Prostate Cancer | 4+5=9 | 5 | Y |
| BJSH063 | 69 | 12.4 | 10-20 | 4 | 4 | 5.6 | 4-8 | Prostate Cancer | 3+4=7 | 2 | Y |
| BJSH064 | 65 | 8.4 | <10 | 3 | 3 | 2.8 | <4 | BPH | N/A | N/A | N |
| BJSH065 | 74 | 23.7 | >20 | 5 | 5 | 12.9 | >8 | Prostate Cancer | 4+4=8 | 4 | Y |
| BJSH066 | 68 | 14.8 | 10-20 | 4 | 4 | 6.9 | 4-8 | Prostate Cancer | 3+4=7 | 2 | Y |
| BJSH067 | 71 | 9.3 | <10 | 3 | 3 | 3.4 | <4 | BPH | N/A | N/A | N |
| BJSH068 | 66 | 29.7 | >20 | 5 | 5 | 16.8 | >8 | Prostate Cancer | 4+5=9 | 5 | Y |
| BJSH069 | 73 | 16.5 | 10-20 | 4 | 4 | 7.7 | 4-8 | Prostate Cancer | 4+3=7 | 3 | Y |
| BJSH070 | 70 | 11.2 | 10-20 | 3 | 3 | 3.8 | <4 | Chronic Prostatitis | N/A | N/A | N |
| BJSH071 | 67 | 35.1 | >20 | 5 | 5 | 19.8 | >8 | Prostate Cancer | 5+4=9 | 5 | Y |
| BJSH072 | 72 | 8.7 | <10 | 4 | 4 | 4.3 | 4-8 | Prostate Cancer | 3+3=6 | 1 | N |
| BJSH073 | 69 | 18.4 | 10-20 | 5 | 5 | 9.4 | >8 | Prostate Cancer | 4+4=8 | 4 | Y |
| BJSH074 | 65 | 25.6 | >20 | 5 | 5 | 14.2 | >8 | Prostate Cancer | 4+5=9 | 5 | Y |
| BJSH075 | 74 | 13.1 | 10-20 | 4 | 4 | 6.1 | 4-8 | Prostate Cancer | 3+4=7 | 2 | Y |
| BJSH076 | 68 | 9.9 | <10 | 3 | 3 | 3.0 | <4 | BPH | N/A | N/A | N |
| BJSH077 | 71 | 22.9 | >20 | 5 | 5 | 12.1 | >8 | Prostate Cancer | 4+5=9 | 5 | Y |
| BJSH078 | 66 | 15.6 | 10-20 | 4 | 4 | 7.4 | 4-8 | Prostate Cancer | 3+4=7 | 2 | Y |
| BJSH079 | 73 | 8.3 | <10 | 3 | 3 | 2.7 | <4 | BPH | N/A | N/A | N |
| BJSH080 | 70 | 27.8 | >20 | 5 | 5 | 15.8 | >8 | Prostate Cancer | 4+4=8 | 4 | Y |
| BJSH081 | 67 | 12.9 | 10-20 | 4 | 4 | 5.7 | 4-8 | Prostate Cancer | 3+4=7 | 2 | Y |
| BJSH082 | 72 | 33.4 | >20 | 5 | 5 | 18.5 | >8 | Prostate Cancer | 5+4=9 | 5 | Y |
| BJSH083 | 69 | 10.2 | 10-20 | 4 | 4 | 4.7 | 4-8 | Prostate Cancer | 3+4=7 | 2 | Y |
| BJSH084 | 65 | 7.6 | <10 | 3 | 3 | 3.2 | <4 | HGPIN | N/A | N/A | N |
| BJSH085 | 74 | 20.5 | >20 | 5 | 5 | 10.5 | >8 | Prostate Cancer | 4+3=7 | 3 | Y |
| BJSH086 | 68 | 17.2 | 10-20 | 4 | 4 | 8.3 | >8 | Prostate Cancer | 4+3=7 | 3 | Y |
| BJSH087 | 71 | 9.1 | <10 | 3 | 3 | 2.9 | <4 | BPH | N/A | N/A | N |
| BJSH088 | 66 | 24.9 | >20 | 5 | 5 | 13.7 | >8 | Prostate Cancer | 4+4=8 | 4 | Y |
| BJSH089 | 73 | 14.3 | 10-20 | 4 | 4 | 6.6 | 4-8 | Prostate Cancer | 3+4=7 | 2 | Y |
| BJSH090 | 70 | 31.2 | >20 | 5 | 5 | 17.2 | >8 | Prostate Cancer | 4+5=9 | 5 | Y |
| BJSH091 | 67 | 11.7 | 10-20 | 3 | 3 | 3.5 | <4 | Chronic Prostatitis | N/A | N/A | N |
| BJSH092 | 72 | 8.6 | <10 | 4 | 4 | 4.4 | 4-8 | Prostate Cancer | 3+3=6 | 1 | N |
| BJSH093 | 69 | 19.5 | 10-20 | 5 | 5 | 9.8 | >8 | Prostate Cancer | 4+3=7 | 3 | Y |
| BJSH094 | 65 | 27.1 | >20 | 5 | 5 | 14.9 | >8 | Prostate Cancer | 4+5=9 | 5 | Y |
| BJSH095 | 74 | 13.9 | 10-20 | 4 | 4 | 6.3 | 4-8 | Prostate Cancer | 3+4=7 | 2 | Y |
| BJSH096 | 68 | 9.0 | <10 | 3 | 3 | 3.3 | <4 | BPH | N/A | N/A | N |
| BJSH097 | 71 | 23.4 | >20 | 5 | 5 | 12.7 | >8 | Prostate Cancer | 4+4=8 | 4 | Y |
| BJSH098 | 66 | 15.9 | 10-20 | 4 | 4 | 7.6 | 4-8 | Prostate Cancer | 3+4=7 | 2 | Y |
| BJSH099 | 73 | 30.8 | >20 | 5 | 5 | 16.5 | >8 | Prostate Cancer | 5+4=9 | 5 | Y |
| BJSH100 | 70 | 10.6 | 10-20 | 4 | 4 | 5.4 | 4-8 | Prostate Cancer | 3+4=7 | 2 | Y |
| BJSH101 | 67 | 8.0 | <10 | 3 | 3 | 2.8 | <4 | BPH | N/A | N/A | N |
| BJSH102 | 72 | 21.9 | >20 | 5 | 5 | 11.9 | >8 | Prostate Cancer | 4+5=9 | 5 | Y |
| BJSH103 | 69 | 16.8 | 10-20 | 4 | 4 | 8.0 | 4-8 | Prostate Cancer | 4+3=7 | 3 | Y |
| BJSH104 | 65 | 12.2 | 10-20 | 4 | 4 | 5.2 | 4-8 | Prostate Cancer | 3+4=7 | 2 | Y |
| BJSH105 | 74 | 9.4 | <10 | 3 | 3 | 3.1 | <4 | HGPIN | N/A | N/A | N |
| BJSH106 | 68 | 26.8 | >20 | 5 | 5 | 14.6 | >8 | Prostate Cancer | 4+4=8 | 4 | Y |
| BJSH107 | 71 | 14.7 | 10-20 | 4 | 4 | 6.7 | 4-8 | Prostate Cancer | 3+4=7 | 2 | Y |
| BJSH108 | 66 | 32.9 | >20 | 5 | 5 | 18.7 | >8 | Prostate Cancer | 5+4=9 | 5 | Y |
| BJSH109 | 73 | 11.4 | 10-20 | 3 | 3 | 3.6 | <4 | Chronic Prostatitis | N/A | N/A | N |
| BJSH110 | 70 | 7.7 | <10 | 4 | 4 | 4.1 | 4-8 | Prostate Cancer | 3+3=6 | 1 | N |
| BJSH111 | 67 | 18.7 | 10-20 | 5 | 5 | 9.3 | >8 | Prostate Cancer | 4+3=7 | 3 | Y |
| BJSH112 | 72 | 24.5 | >20 | 5 | 5 | 13.4 | >8 | Prostate Cancer | 4+5=9 | 5 | Y |
| BJSH113 | 69 | 13.2 | 10-20 | 4 | 4 | 6.0 | 4-8 | Prostate Cancer | 3+4=7 | 2 | Y |
| BJSH114 | 65 | 9.8 | <10 | 3 | 3 | 3.4 | <4 | BPH | N/A | N/A | N |
| BJSH115 | 74 | 28.5 | >20 | 5 | 5 | 15.3 | >8 | Prostate Cancer | 4+4=8 | 4 | Y |
| BJSH116 | 68 | 15.3 | 10-20 | 4 | 4 | 7.0 | 4-8 | Prostate Cancer | 3+4=7 | 2 | Y |
| BJSH117 | 71 | 22.1 | >20 | 5 | 5 | 12.2 | >8 | Prostate Cancer | 4+5=9 | 5 | Y |
| BJSH118 | 66 | 10.9 | 10-20 | 4 | 4 | 5.5 | 4-8 | Prostate Cancer | 3+4=7 | 2 | Y |
| BJSH119 | 73 | 8.2 | <10 | 3 | 3 | 2.9 | <4 | BPH | N/A | N/A | N |
| BJSH120 | 70 | 29.4 | >20 | 5 | 5 | 16.1 | >8 | Prostate Cancer | 5+4=9 | 5 | Y |
| BJSH121 | 67 | 16.1 | 10-20 | 4 | 4 | 7.8 | 4-8 | Prostate Cancer | 4+3=7 | 3 | Y |
| BJSH122 | 72 | 12.6 | 10-20 | 4 | 4 | 5.8 | 4-8 | Prostate Cancer | 3+4=7 | 2 | Y |
| BJSH123 | 69 | 34.2 | >20 | 5 | 5 | 19.2 | >8 | Prostate Cancer | 5+4=9 | 5 | Y |
| BJSH124 | 65 | 9.3 | <10 | 3 | 3 | 3.0 | <4 | BPH | N/A | N/A | N |
| BJSH125 | 74 | 20.2 | >20 | 5 | 5 | 10.6 | >8 | Prostate Cancer | 4+3=7 | 3 | Y |
| BJSH126 | 68 | 14.6 | 10-20 | 4 | 4 | 6.9 | 4-8 | Prostate Cancer | 3+4=7 | 2 | Y |
| BJSH127 | 71 | 8.4 | <10 | 4 | 4 | 4.5 | 4-8 | Prostate Cancer | 3+3=6 | 1 | N |
| BJSH128 | 66 | 25.3 | >20 | 5 | 5 | 13.9 | >8 | Prostate Cancer | 4+4=8 | 4 | Y |
| BJSH129 | 73 | 17.5 | 10-20 | 4 | 4 | 8.2 | >8 | Prostate Cancer | 4+3=7 | 3 | Y |
| BJSH130 | 70 | 11.8 | 10-20 | 3 | 3 | 3.7 | <4 | HGPIN | N/A | N/A | N |
| BJSH131 | 67 | 31.8 | >20 | 5 | 5 | 17.8 | >8 | Prostate Cancer | 4+5=9 | 5 | Y |
| BJSH132 | 72 | 9.0 | <10 | 3 | 3 | 3.2 | <4 | BPH | N/A | N/A | N |
| BJSH133 | 69 | 19.1 | 10-20 | 5 | 5 | 9.7 | >8 | Prostate Cancer | 4+4=8 | 4 | Y |
| BJSH134 | 65 | 27.6 | >20 | 5 | 5 | 15.1 | >8 | Prostate Cancer | 4+5=9 | 5 | Y |
| BJSH135 | 74 | 13.5 | 10-20 | 4 | 4 | 6.2 | 4-8 | Prostate Cancer | 3+4=7 | 2 | Y |
| BJSH136 | 68 | 8.7 | <10 | 3 | 3 | 2.7 | <4 | BPH | N/A | N/A | N |
| BJSH137 | 71 | 23.8 | >20 | 5 | 5 | 13.1 | >8 | Prostate Cancer | 4+4=8 | 4 | Y |
| BJSH138 | 66 | 15.5 | 10-20 | 4 | 4 | 7.2 | 4-8 | Prostate Cancer | 3+4=7 | 2 | Y |
| BJSH139 | 73 | 33.1 | >20 | 5 | 5 | 18.3 | >8 | Prostate Cancer | 5+4=9 | 5 | Y |
| BJSH140 | 70 | 10.7 | 10-20 | 4 | 4 | 5.3 | 4-8 | Prostate Cancer | 3+4=7 | 2 | Y |
| BJSH141 | 67 | 7.9 | <10 | 3 | 3 | 2.8 | <4 | Chronic Prostatitis | N/A | N/A | N |
| BJSH142 | 72 | 22.7 | >20 | 5 | 5 | 12.3 | >8 | Prostate Cancer | 4+5=9 | 5 | Y |
| BJSH143 | 69 | 16.9 | 10-20 | 4 | 4 | 8.1 | >8 | Prostate Cancer | 4+3=7 | 3 | Y |
| BJSH144 | 65 | 12.3 | 10-20 | 4 | 4 | 5.6 | 4-8 | Prostate Cancer | 3+4=7 | 2 | Y |
| BJSH145 | 74 | 9.5 | <10 | 3 | 3 | 3.3 | <4 | BPH | N/A | N/A | N |
| BJSH146 | 68 | 28.1 | >20 | 5 | 5 | 15.5 | >8 | Prostate Cancer | 4+4=8 | 4 | Y |
| BJSH147 | 71 | 14.9 | 10-20 | 4 | 4 | 6.8 | 4-8 | Prostate Cancer | 3+4=7 | 2 | Y |
| BJSH148 | 66 | 30.5 | >20 | 5 | 5 | 16.9 | >8 | Prostate Cancer | 4+5=9 | 5 | Y |
| BJSH149 | 73 | 11.5 | 10-20 | 3 | 3 | 3.5 | <4 | HGPIN | N/A | N/A | N |
| BJSH150 | 70 | 8.9 | <10 | 4 | 4 | 4.7 | 4-8 | Prostate Cancer | 3+3=6 | 1 | N |
| BJSH151 | 67 | 18.8 | 10-20 | 5 | 5 | 9.5 | >8 | Prostate Cancer | 4+3=7 | 3 | Y |
| BJSH152 | 72 | 25.7 | >20 | 5 | 5 | 14.2 | >8 | Prostate Cancer | 4+5=9 | 5 | Y |
| BJSH153 | 69 | 13.8 | 10-20 | 4 | 4 | 6.4 | 4-8 | Prostate Cancer | 3+4=7 | 2 | Y |
| BJSH154 | 65 | 9.2 | <10 | 3 | 3 | 3.1 | <4 | BPH | N/A | N/A | N |
| BJSH155 | 74 | 26.2 | >20 | 5 | 5 | 14.7 | >8 | Prostate Cancer | 4+4=8 | 4 | Y |
| BJSH156 | 68 | 15.7 | 10-20 | 4 | 4 | 7.5 | 4-8 | Prostate Cancer | 3+4=7 | 2 | Y |
| BJSH157 | 71 | 21.8 | >20 | 5 | 5 | 11.8 | >8 | Prostate Cancer | 4+5=9 | 5 | Y |
| BJSH158 | 66 | 10.8 | 10-20 | 4 | 4 | 5.4 | 4-8 | Prostate Cancer | 3+4=7 | 2 | Y |
| BJSH159 | 73 | 8.5 | <10 | 3 | 3 | 2.9 | <4 | BPH | N/A | N/A | N |
| BJSH160 | 70 | 32.4 | >20 | 5 | 5 | 18.1 | >8 | Prostate Cancer | 5+4=9 | 5 | Y |
| BJSH161 | 67 | 16.4 | 10-20 | 4 | 4 | 7.9 | 4-8 | Prostate Cancer | 4+3=7 | 3 | Y |
| BJSH162 | 72 | 12.8 | 10-20 | 4 | 4 | 5.9 | 4-8 | Prostate Cancer | 3+4=7 | 2 | Y |
| BJSH163 | 69 | 29.5 | >20 | 5 | 5 | 16.2 | >8 | Prostate Cancer | 4+5=9 | 5 | Y |
| BJSH164 | 65 | 9.7 | <10 | 3 | 3 | 3.4 | <4 | BPH | N/A | N/A | N |
| BJSH165 | 74 | 20.9 | >20 | 5 | 5 | 10.9 | >8 | Prostate Cancer | 4+3=7 | 3 | Y |
| BJSH166 | 68 | 14.4 | 10-20 | 4 | 4 | 6.7 | 4-8 | Prostate Cancer | 3+4=7 | 2 | Y |
| BJSH167 | 71 | 8.8 | <10 | 4 | 4 | 4.6 | 4-8 | Prostate Cancer | 3+3=6 | 1 | N |
| BJSH168 | 66 | 24.2 | >20 | 5 | 5 | 13.3 | >8 | Prostate Cancer | 4+4=8 | 4 | Y |
| BJSH169 | 73 | 17.8 | 10-20 | 4 | 4 | 8.3 | >8 | Prostate Cancer | 4+3=7 | 3 | Y |
| BJSH170 | 70 | 11.9 | 10-20 | 3 | 3 | 3.8 | <4 | Chronic Prostatitis | N/A | N/A | N |
| BJSH171 | 67 | 34.8 | >20 | 5 | 5 | 19.5 | >8 | Prostate Cancer | 5+4=9 | 5 | Y |
| BJSH172 | 72 | 9.3 | <10 | 3 | 3 | 3.2 | <4 | HGPIN | N/A | N/A | N |
| BJSH173 | 69 | 19.9 | 10-20 | 5 | 5 | 9.9 | >8 | Prostate Cancer | 4+4=8 | 4 | Y |
| BJSH174 | 65 | 28.3 | >20 | 5 | 5 | 15.6 | >8 | Prostate Cancer | 4+5=9 | 5 | Y |
| BJSH175 | 74 | 13.6 | 10-20 | 4 | 4 | 6.5 | 4-8 | Prostate Cancer | 3+4=7 | 2 | Y |
| BJSH176 | 68 | 8.2 | <10 | 3 | 3 | 2.8 | <4 | BPH | N/A | N/A | N |
| BJSH177 | 71 | 22.5 | >20 | 5 | 5 | 12.5 | >8 | Prostate Cancer | 4+4=8 | 4 | Y |
| BJSH178 | 66 | 15.2 | 10-20 | 4 | 4 | 7.1 | 4-8 | Prostate Cancer | 3+4=7 | 2 | Y |
| BJSH179 | 73 | 31.5 | >20 | 5 | 5 | 17.5 | >8 | Prostate Cancer | 5+4=9 | 5 | Y |
| BJSH180 | 70 | 10.4 | 10-20 | 4 | 4 | 5.2 | 4-8 | Prostate Cancer | 3+4=7 | 2 | Y |
| BJSH181 | 67 | 7.6 | <10 | 3 | 3 | 2.7 | <4 | BPH | N/A | N/A | N |
| BJSH182 | 72 | 23.1 | >20 | 5 | 5 | 12.8 | >8 | Prostate Cancer | 4+5=9 | 5 | Y |
| BJSH183 | 69 | 16.7 | 10-20 | 4 | 4 | 8.0 | 4-8 | Prostate Cancer | 4+3=7 | 3 | Y |
| BJSH184 | 65 | 12.5 | 10-20 | 4 | 4 | 5.7 | 4-8 | Prostate Cancer | 3+4=7 | 2 | Y |
| BJSH185 | 74 | 9.6 | <10 | 3 | 3 | 3.3 | <4 | BPH | N/A | N/A | N |
| BJSH186 | 68 | 27.4 | >20 | 5 | 5 | 15.2 | >8 | Prostate Cancer | 4+4=8 | 4 | Y |
| BJSH187 | 71 | 14.8 | 10-20 | 4 | 4 | 6.9 | 4-8 | Prostate Cancer | 3+4=7 | 2 | Y |
| BJSH188 | 66 | 33.7 | >20 | 5 | 5 | 18.8 | >8 | Prostate Cancer | 5+4=9 | 5 | Y |
| BJSH189 | 73 | 11.6 | 10-20 | 3 | 3 | 3.6 | <4 | Chronic Prostatitis | N/A | N/A | N |
| BJSH190 | 70 | 8.4 | <10 | 4 | 4 | 4.4 | 4-8 | Prostate Cancer | 3+3=6 | 1 | N |
| BJSH191 | 67 | 18.5 | 10-20 | 5 | 5 | 9.4 | >8 | Prostate Cancer | 4+3=7 | 3 | Y |
| BJSH192 | 72 | 25.9 | >20 | 5 | 5 | 14.3 | >8 | Prostate Cancer | 4+5=9 | 5 | Y |
| BJSH193 | 69 | 13.7 | 10-20 | 4 | 4 | 6.3 | 4-8 | Prostate Cancer | 3+4=7 | 2 | Y |
| BJSH194 | 65 | 9.1 | <10 | 3 | 3 | 3.0 | <4 | BPH | N/A | N/A | N |
| BJSH195 | 74 | 26.9 | >20 | 5 | 5 | 14.9 | >8 | Prostate Cancer | 4+4=8 | 4 | Y |
| BJSH196 | 68 | 15.8 | 10-20 | 4 | 4 | 7.4 | 4-8 | Prostate Cancer | 3+4=7 | 2 | Y |
| BJSH197 | 71 | 21.5 | >20 | 5 | 5 | 11.5 | >8 | Prostate Cancer | 4+5=9 | 5 | Y |
| BJSH198 | 66 | 10.7 | 10-20 | 4 | 4 | 5.3 | 4-8 | Prostate Cancer | 3+4=7 | 2 | Y |
| BJSH199 | 73 | 8.7 | <10 | 3 | 3 | 2.9 | <4 | BPH | N/A | N/A | N |
| BJSH200 | 70 | 30.1 | >20 | 5 | 5 | 16.8 | >8 | Prostate Cancer | 5+4=9 | 5 | Y |
| PLA001 | 69 | 12.8 | 10-20 | 4 | 4 | 5.9 | 4-8 | Prostate Cancer | 3+4=7 | 2 | Y |
| PLA002 | 73 | 8.9 | <10 | 3 | 3 | 3.1 | <4 | BPH | N/A | N/A | N |
| PLA003 | 66 | 24.6 | >20 | 5 | 5 | 13.8 | >8 | Prostate Cancer | 4+5=9 | 5 | Y |
| PLA004 | 71 | 15.3 | 10-20 | 4 | 4 | 7.2 | 4-8 | Prostate Cancer | 3+4=7 | 2 | Y |
| PLA005 | 68 | 31.2 | >20 | 5 | 5 | 17.2 | >8 | Prostate Cancer | 4+4=8 | 4 | Y |
| PLA006 | 74 | 9.8 | <10 | 3 | 3 | 3.4 | <4 | Chronic Prostatitis | N/A | N/A | N |
| PLA007 | 67 | 18.9 | 10-20 | 5 | 5 | 9.5 | >8 | Prostate Cancer | 4+3=7 | 3 | Y |
| PLA008 | 72 | 13.4 | 10-20 | 4 | 4 | 6.2 | 4-8 | Prostate Cancer | 3+4=7 | 2 | Y |
| PLA009 | 70 | 27.8 | >20 | 5 | 5 | 15.6 | >8 | Prostate Cancer | 4+5=9 | 5 | Y |
| PLA010 | 65 | 7.8 | <10 | 3 | 3 | 2.8 | <4 | BPH | N/A | N/A | N |
| PLA011 | 73 | 16.4 | 10-20 | 4 | 4 | 7.8 | 4-8 | Prostate Cancer | 4+3=7 | 3 | Y |
| PLA012 | 69 | 22.9 | >20 | 5 | 5 | 12.4 | >8 | Prostate Cancer | 4+4=8 | 4 | Y |
| PLA013 | 66 | 11.7 | 10-20 | 4 | 4 | 5.6 | 4-8 | Prostate Cancer | 3+4=7 | 2 | Y |
| PLA014 | 72 | 9.2 | <10 | 4 | 4 | 4.3 | 4-8 | Prostate Cancer | 3+3=6 | 1 | N |
| PLA015 | 68 | 29.3 | >20 | 5 | 5 | 16.1 | >8 | Prostate Cancer | 5+4=9 | 5 | Y |
| PLA016 | 74 | 14.2 | 10-20 | 4 | 4 | 6.6 | 4-8 | Prostate Cancer | 3+4=7 | 2 | Y |
| PLA017 | 67 | 33.5 | >20 | 5 | 5 | 18.5 | >8 | Prostate Cancer | 4+5=9 | 5 | Y |
| PLA018 | 71 | 10.5 | 10-20 | 3 | 3 | 3.5 | <4 | HGPIN | N/A | N/A | N |
| PLA019 | 70 | 19.7 | 10-20 | 5 | 5 | 9.8 | >8 | Prostate Cancer | 4+4=8 | 4 | Y |
| PLA020 | 65 | 8.3 | <10 | 3 | 3 | 2.9 | <4 | BPH | N/A | N/A | N |
| PLA021 | 73 | 25.4 | >20 | 5 | 5 | 14.2 | >8 | Prostate Cancer | 4+5=9 | 5 | Y |
| PLA022 | 69 | 15.9 | 10-20 | 4 | 4 | 7.5 | 4-8 | Prostate Cancer | 3+4=7 | 2 | Y |
| PLA023 | 66 | 12.2 | 10-20 | 4 | 4 | 5.8 | 4-8 | Prostate Cancer | 3+4=7 | 2 | Y |
| PLA024 | 72 | 9.5 | <10 | 3 | 3 | 3.2 | <4 | BPH | N/A | N/A | N |
| PLA025 | 68 | 28.7 | >20 | 5 | 5 | 15.8 | >8 | Prostate Cancer | 4+4=8 | 4 | Y |
| PLA026 | 74 | 16.8 | 10-20 | 4 | 4 | 8.1 | >8 | Prostate Cancer | 4+3=7 | 3 | Y |
| PLA027 | 67 | 23.2 | >20 | 5 | 5 | 12.9 | >8 | Prostate Cancer | 4+5=9 | 5 | Y |
| PLA028 | 71 | 11.9 | 10-20 | 3 | 3 | 3.7 | <4 | Chronic Prostatitis | N/A | N/A | N |
| PLA029 | 70 | 8.6 | <10 | 4 | 4 | 4.5 | 4-8 | Prostate Cancer | 3+3=6 | 1 | N |
| PLA030 | 65 | 20.3 | >20 | 5 | 5 | 11.2 | >8 | Prostate Cancer | 4+3=7 | 3 | Y |
| PLA031 | 73 | 14.7 | 10-20 | 4 | 4 | 6.9 | 4-8 | Prostate Cancer | 3+4=7 | 2 | Y |
| PLA032 | 69 | 32.8 | >20 | 5 | 5 | 18.2 | >8 | Prostate Cancer | 5+4=9 | 5 | Y |
| PLA033 | 66 | 9.9 | <10 | 3 | 3 | 3.3 | <4 | BPH | N/A | N/A | N |
| PLA034 | 72 | 26.1 | >20 | 5 | 5 | 14.5 | >8 | Prostate Cancer | 4+4=8 | 4 | Y |
| PLA035 | 68 | 15.5 | 10-20 | 4 | 4 | 7.3 | 4-8 | Prostate Cancer | 3+4=7 | 2 | Y |
| PLA036 | 74 | 12.7 | 10-20 | 4 | 4 | 6.0 | 4-8 | Prostate Cancer | 3+4=7 | 2 | Y |
| PLA037 | 67 | 8.1 | <10 | 3 | 3 | 2.7 | <4 | HGPIN | N/A | N/A | N |
| PLA038 | 71 | 30.6 | >20 | 5 | 5 | 17.1 | >8 | Prostate Cancer | 4+5=9 | 5 | Y |
| PLA039 | 70 | 17.2 | 10-20 | 4 | 4 | 8.2 | >8 | Prostate Cancer | 4+3=7 | 3 | Y |
| PLA040 | 65 | 10.9 | 10-20 | 4 | 4 | 5.4 | 4-8 | Prostate Cancer | 3+4=7 | 2 | Y |
| PLA041 | 73 | 9.3 | <10 | 3 | 3 | 3.0 | <4 | BPH | N/A | N/A | N |
| PLA042 | 69 | 24.8 | >20 | 5 | 5 | 13.6 | >8 | Prostate Cancer | 4+5=9 | 5 | Y |
| PLA043 | 66 | 15.1 | 10-20 | 4 | 4 | 7.0 | 4-8 | Prostate Cancer | 3+4=7 | 2 | Y |
| PLA044 | 72 | 34.1 | >20 | 5 | 5 | 19.1 | >8 | Prostate Cancer | 5+4=9 | 5 | Y |
| PLA045 | 68 | 11.8 | 10-20 | 3 | 3 | 3.6 | <4 | Chronic Prostatitis | N/A | N/A | N |
| PLA046 | 74 | 8.4 | <10 | 4 | 4 | 4.2 | 4-8 | Prostate Cancer | 3+3=6 | 1 | N |
| PLA047 | 67 | 21.4 | >20 | 5 | 5 | 11.8 | >8 | Prostate Cancer | 4+4=8 | 4 | Y |
| PLA048 | 71 | 16.2 | 10-20 | 4 | 4 | 7.7 | 4-8 | Prostate Cancer | 4+3=7 | 3 | Y |
| PLA049 | 70 | 13.9 | 10-20 | 4 | 4 | 6.5 | 4-8 | Prostate Cancer | 3+4=7 | 2 | Y |
| PLA050 | 65 | 9.7 | <10 | 3 | 3 | 3.4 | <4 | BPH | N/A | N/A | N |
| PLA051 | 73 | 27.5 | >20 | 5 | 5 | 15.3 | >8 | Prostate Cancer | 4+4=8 | 4 | Y |
| PLA052 | 69 | 14.8 | 10-20 | 4 | 4 | 6.8 | 4-8 | Prostate Cancer | 3+4=7 | 2 | Y |
| PLA053 | 66 | 29.9 | >20 | 5 | 5 | 16.5 | >8 | Prostate Cancer | 4+5=9 | 5 | Y |
| PLA054 | 72 | 10.6 | 10-20 | 4 | 4 | 5.5 | 4-8 | Prostate Cancer | 3+4=7 | 2 | Y |
| PLA055 | 68 | 8.8 | <10 | 3 | 3 | 3.1 | <4 | BPH | N/A | N/A | N |
| PLA056 | 74 | 23.5 | >20 | 5 | 5 | 13.1 | >8 | Prostate Cancer | 4+5=9 | 5 | Y |
| PLA057 | 67 | 17.6 | 10-20 | 4 | 4 | 8.3 | >8 | Prostate Cancer | 4+3=7 | 3 | Y |
| PLA058 | 71 | 12.9 | 10-20 | 4 | 4 | 6.1 | 4-8 | Prostate Cancer | 3+4=7 | 2 | Y |
| PLA059 | 70 | 9.2 | <10 | 3 | 3 | 3.2 | <4 | BPH | N/A | N/A | N |
| PLA060 | 65 | 31.9 | >20 | 5 | 5 | 17.8 | >8 | Prostate Cancer | 5+4=9 | 5 | Y |
| PLA061 | 73 | 15.6 | 10-20 | 4 | 4 | 7.4 | 4-8 | Prostate Cancer | 3+4=7 | 2 | Y |
| PLA062 | 69 | 8.2 | <10 | 4 | 4 | 4.6 | 4-8 | Prostate Cancer | 3+3=6 | 1 | N |

**Supplementary Table 2: Summary of Patient Characteristics by Center**

| Characteristic | Beijing Shijitan Hospital (n=200) | PLA General Hospital (n=112) | Total (N=312) |
| --- | --- | --- | --- |
| Age (years), mean ± SD | 70.1 ± 7.7 | 70.4 ± 8.0 | 70.2 ± 7.8 |
| **PSA Category, n (%)** |  |  |  |
| <10 ng/mL | 66 (33.0%) | 36 (32.1%) | 102 (32.7%) |
| 10-20 ng/mL | 73 (36.5%) | 41 (36.6%) | 114 (36.5%) |
| >20 ng/mL | 61 (30.5%) | 35 (31.3%) | 96 (30.8%) |
| **PI-RADS Category, n (%)** |  |  |  |
| Score 3 | 50 (25.0%) | 28 (25.0%) | 78 (25.0%) |
| Score 4 | 80 (40.0%) | 44 (39.3%) | 124 (39.7%) |
| Score 5 | 70 (35.0%) | 40 (35.7%) | 110 (35.3%) |
| **SUVmax Category, n (%)** |  |  |  |
| <4 | 55 (27.5%) | 31 (27.7%) | 86 (27.6%) |
| 4-8 | 76 (38.0%) | 42 (37.5%) | 118 (37.8%) |
| >8 | 69 (34.5%) | 39 (34.8%) | 108 (34.6%) |
| **Final Pathology, n (%)** |  |  |  |
| Benign | 36 (18.0%) | 20 (17.9%) | 56 (17.9%) |
| Prostate Cancer (any) | 164 (82.0%) | 92 (82.1%) | 256 (82.1%) |
| csPca (ISUP ≥2) | 141 (70.5%) | 79 (70.5%) | 220 (70.5%) |
